# Supplementary material
Source: PubMed Central journal article supplement (PMC3234754)
Supplement: supp_M111.243493_jbc.M111.243493-1.pdf [file supp_M111.243493_jbc.M111.243493-1.pdf]

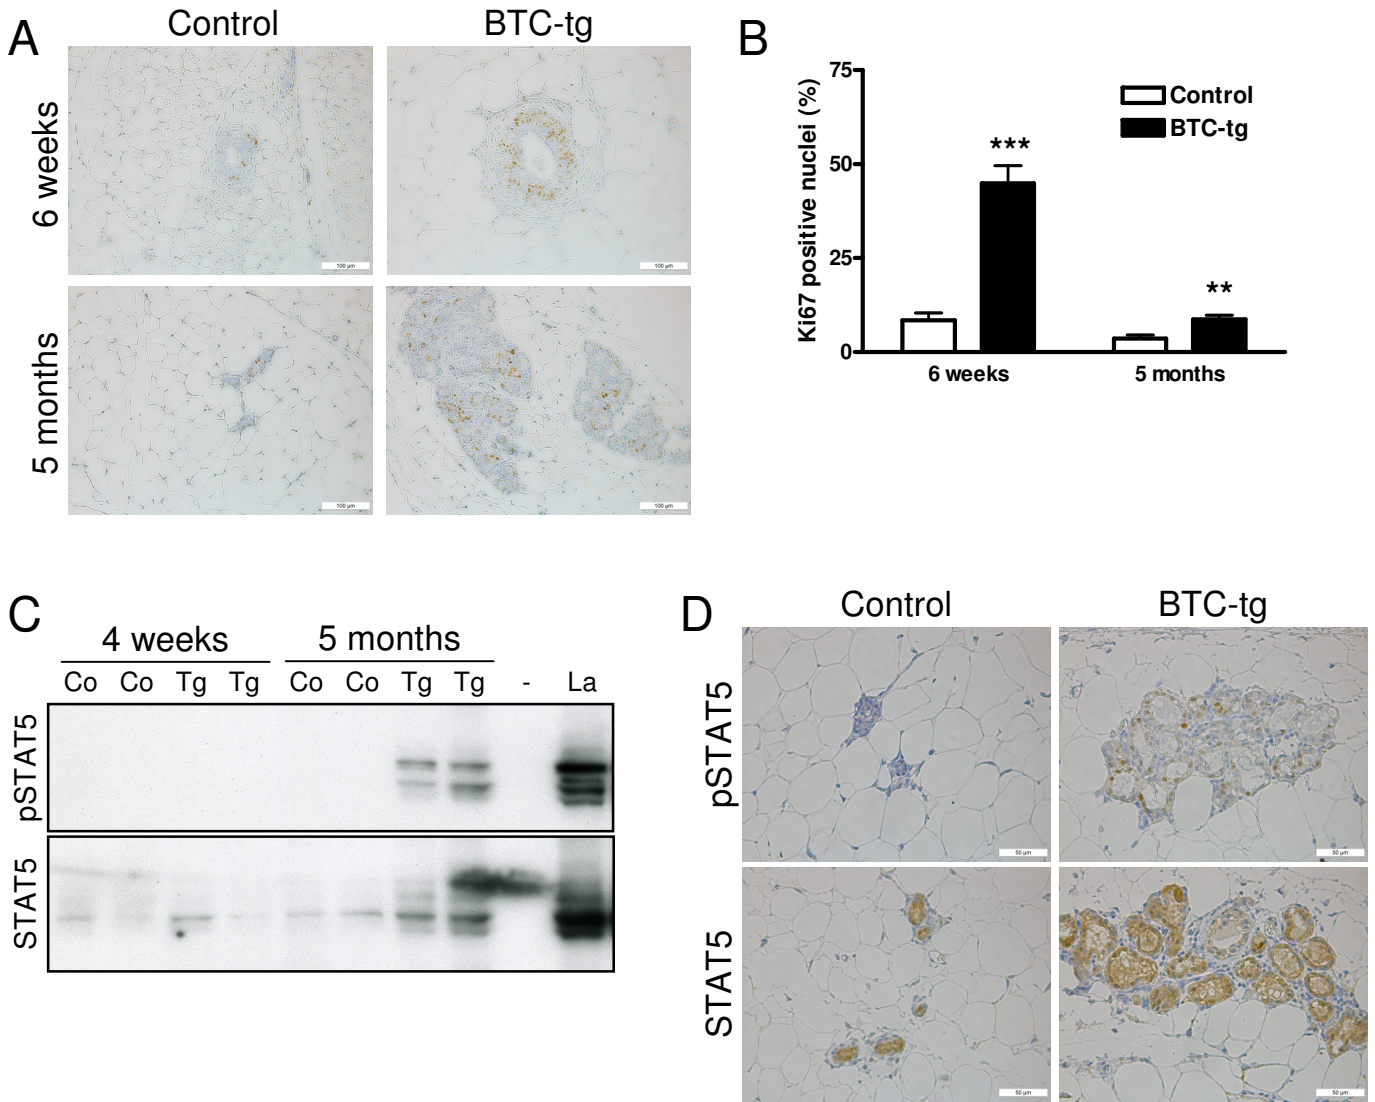

**SUPPL. FIG. 1.** A: Ki67 immunohistochemistry suggested a higher number of proliferating cells in the mammary glands of BTC-tg females at the ages of 6 weeks and 5 months as compared to control littermates. B: Quantitative analysis confirmed an increased rate of cell proliferation in the mammary glands of BTC-tg females as compared to control females at both ages. Means  $\pm$  SD, \*\*:  $P < 0.01$ , \*\*\*:  $P < 0.001$ . C: Western blot analysis showed the presence of phosphorylated STAT5 in the mammary gland of BTC-tg females; protein extract from a lactating control female was loaded as a control (La). D: Immunohistochemistry demonstrating total and phosphorylated STAT5 in the mammary glands of 5-month-old BTC-tg mice and control females.
